# Supplementary material for: MOF-derived, carbon-mediated construction of a hierarchical rod-shaped MoO3/Co3O4 heterojunction towards efficient triethylamine detection
Source: Royal Society of Chemistry journal article supplement (doi:10.1039/d4tc04101a), 2024-11-28
Supplement: d4tc04101a1.pdf [file d4tc04101a1.pdf]

*Electronic Supplementary Information for*

**MOF-derived carbon mediated construction of hierarchical rod-shaped MoO<sub>3</sub>/Co<sub>3</sub>O<sub>4</sub> heterojunction towards efficient triethylamine detection**

Qingmei Zhang,<sup>a</sup> Yuanhui Zhang,<sup>a</sup> Keyi Ge,<sup>a</sup> Fei Huang,<sup>a</sup> Hu Meng,<sup>b</sup> and Wei Yang<sup>\*a</sup>

<sup>a</sup> Key Lab for Green Chemical Process (Ministry of Education), School of Chemistry and Environmental Engineering, Wuhan Institute of Technology, Wuhan 430205, China.

<sup>b</sup> Department of Instrumentation and Analytical Chemistry, CAS Key Laboratory of Separation Science for Analytical Chemistry, Dalian Institute of Chemical Physics, Chinese Academy of Sciences (CAS), Dalian 116023, China.

\*Corresponding author: (E-mail) [yangw@wit.edu.cn](mailto:yangw@wit.edu.cn).

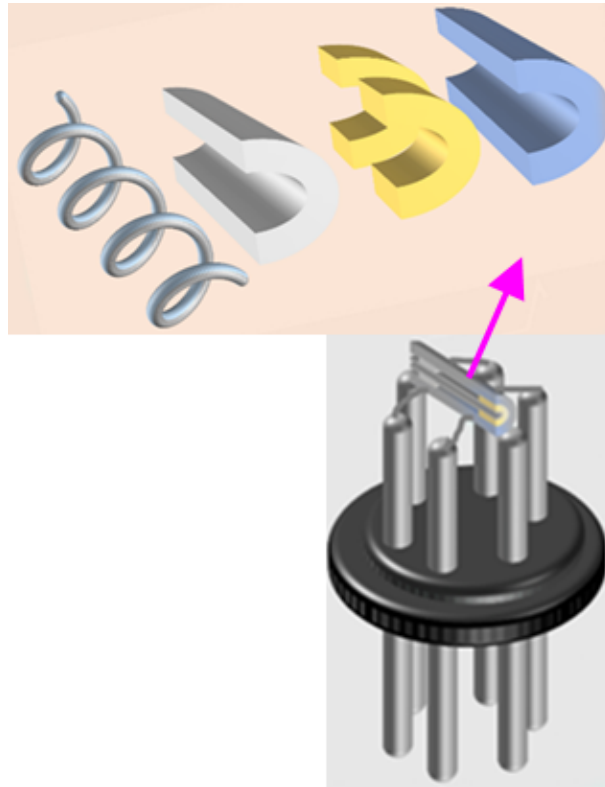

**Fig. S1** Schematic diagram of a gas sensor.

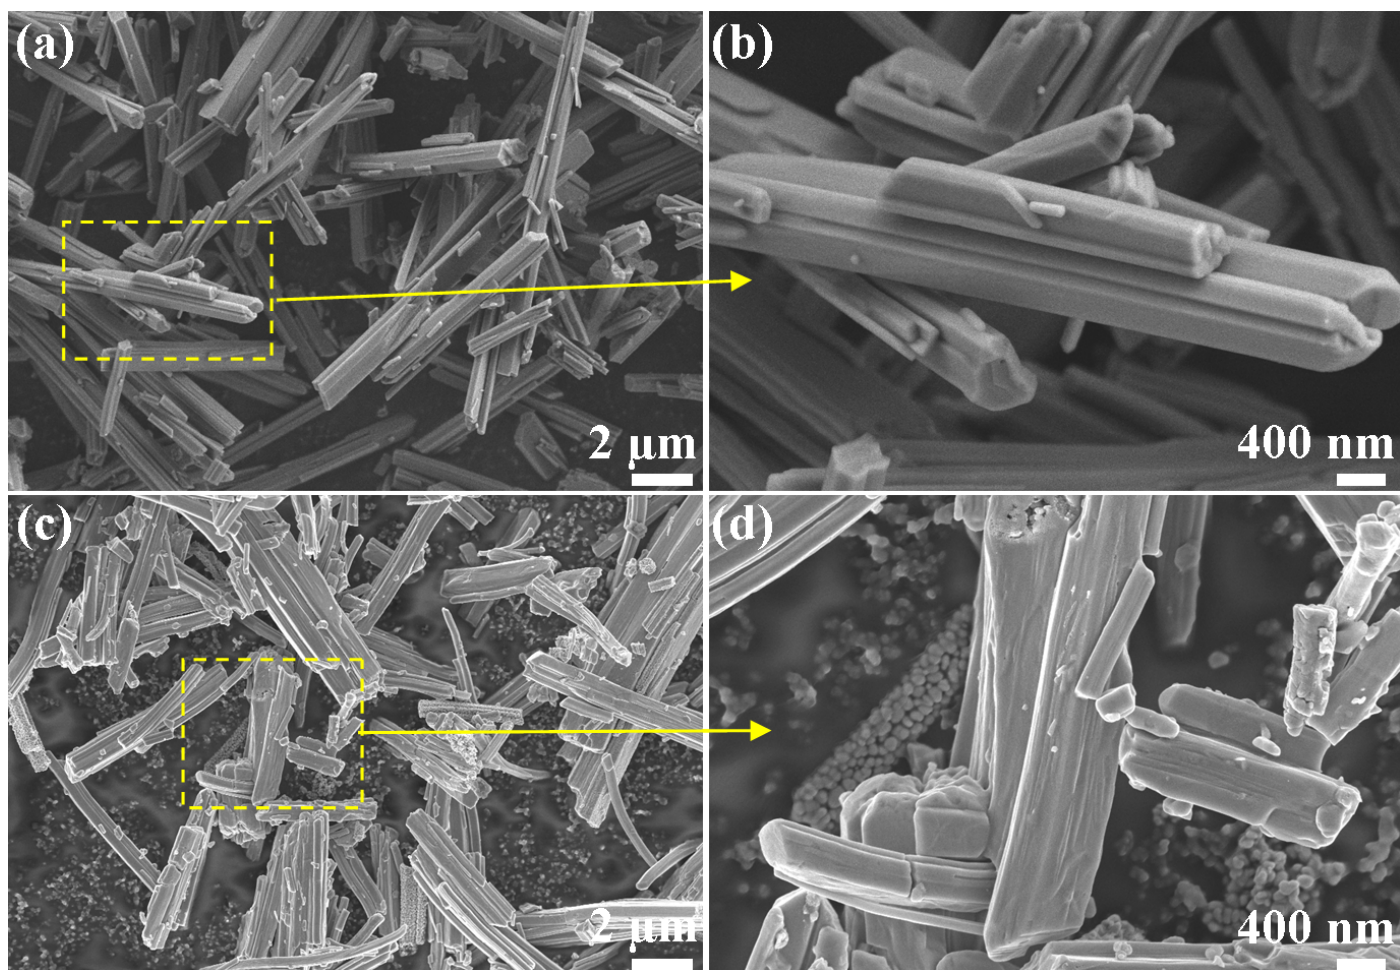

**Fig. S2** SEM images of (a, b) Mo-MOF, and (c, d) MoO<sub>2</sub>/C.

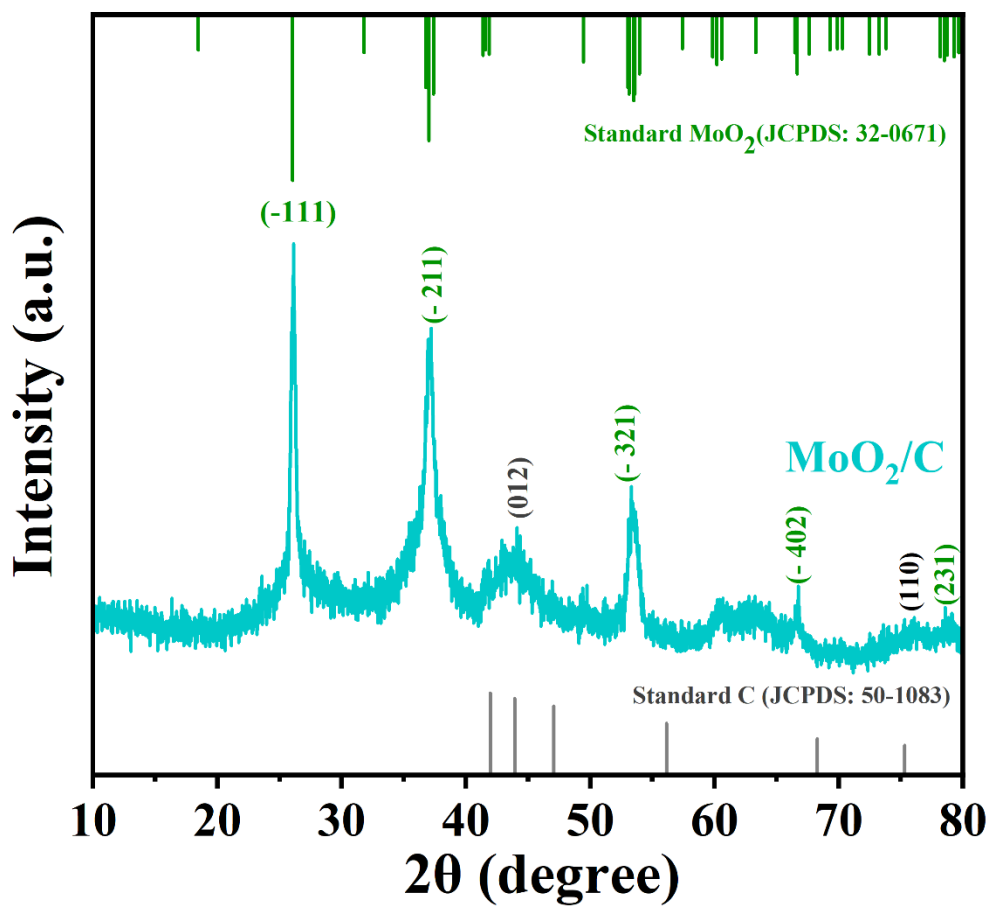

Fig. S3 XRD pattern of the as-prepared MoO<sub>2</sub>/C sample.

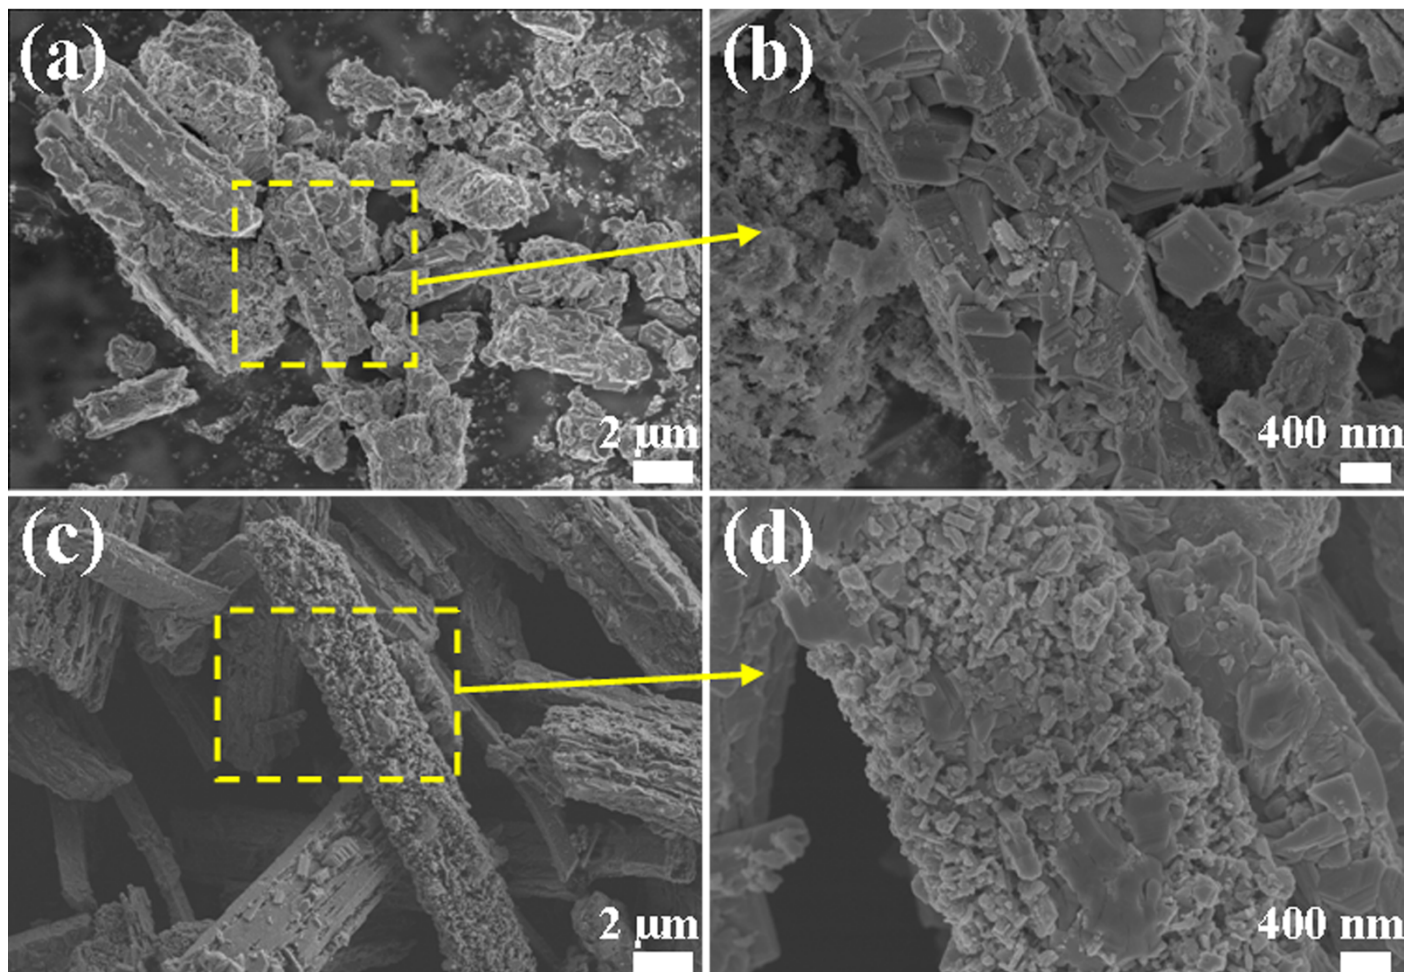

**Fig. S4** SEM images of the (a, b) MoO<sub>3</sub>/Co<sub>3</sub>O<sub>4</sub>-1, and (c, d) MoO<sub>3</sub>/Co<sub>3</sub>O<sub>4</sub>-3.

**Table. S1** Detailed synthetic conditions for the sample preparations.

| <b>Samples</b>                                      | <b>MoO<sub>2</sub>/C</b> | <b>Co(NO<sub>3</sub>)<sub>2</sub>·6H<sub>2</sub>O</b> | <b>2-MeI</b> | <b>PVP</b> |
|-----------------------------------------------------|--------------------------|-------------------------------------------------------|--------------|------------|
| MoO <sub>3</sub>                                    | 25 mg                    | 0                                                     | 0            | 0          |
| Co <sub>3</sub> O <sub>4</sub>                      | 0                        | 0.0735 mmol                                           | 0.588 mmol   | 10 mg      |
| MoO <sub>3</sub> /Co <sub>3</sub> O <sub>4</sub> -1 | 25 mg                    | 0.0368 mmol                                           | 0.294 mmol   | 10 mg      |
| MoO <sub>3</sub> /Co <sub>3</sub> O <sub>4</sub> -2 | 25 mg                    | 0.0735 mmol                                           | 0.588 mmol   | 10 mg      |
| MoO <sub>3</sub> /Co <sub>3</sub> O <sub>4</sub> -3 | 25 mg                    | 0.147 mmol                                            | 1.176 mmol   | 10 mg      |

### Calculation of the theoretical limit of detection (LOD)

The noise value for the sensor was calculated using the variation in the relative sensor response in the baseline level using the root-mean-square (RMS) deviation. 100 points obtained from Fig. 9a before exposed to TEA were averaged and a standard deviation ( $S^2$ ) was gathered as 0.00786859. The RMS noise can be calculated as following formula:

$$RMS_{noise} = \sqrt{S^2/N} \quad (N = 100)$$

The RMS noise was calculated to be 0.00887051.

According to the IUPAC definition, the signal (S) to noise (N) ratio (S/N) is 3, and the slope is 1.81487 from inset of Fig. 9b, therefore, the theoretic limit of detection (LOD) can be calculated as following:

$$LOD = 3*(RMS_{noise} / Slope) = 3*(0.00887051/1.81487) = 0.0147\text{ppm} = 14.7 \text{ ppb}$$
